# Supplementary material for: Associations of City-Level Active Aging and Age Friendliness with Well-Being among Older Adults Aged 55 and Over in Taiwan
Source: Int J Environ Res Public Health. 2020 Jun 16;17(12):4304. doi: 10.3390/ijerph17124304 (PMC7345662; doi:10.3390/ijerph17124304)
Supplement: Supplementary file 1 [file ijerph-17-04304-s001.pdf]

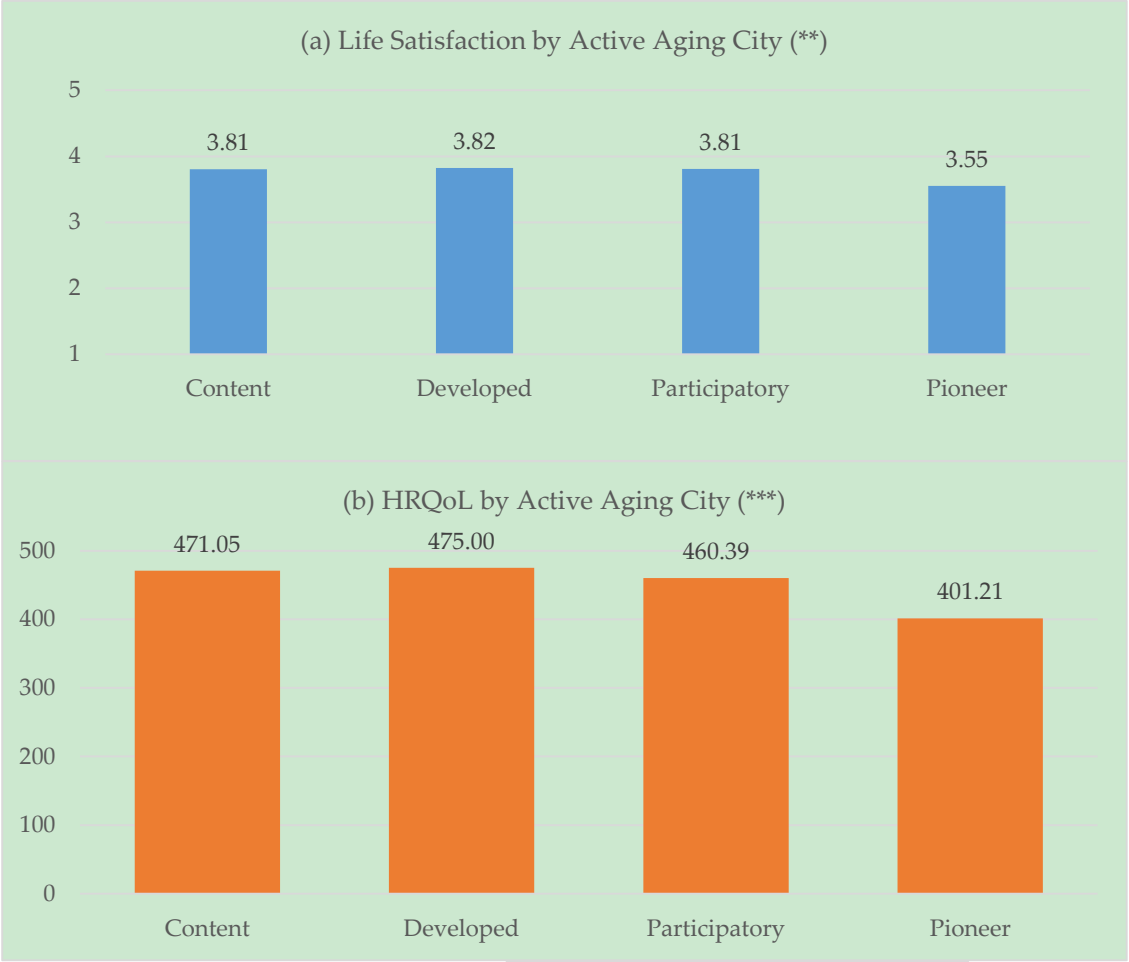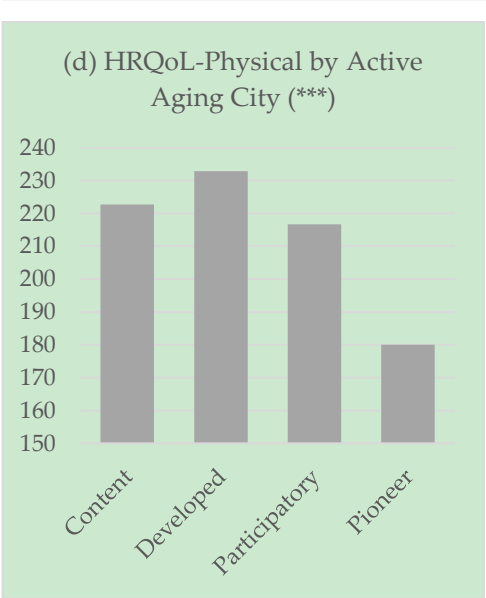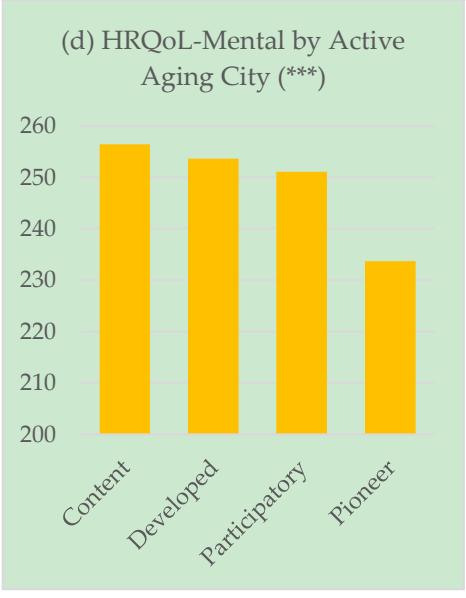

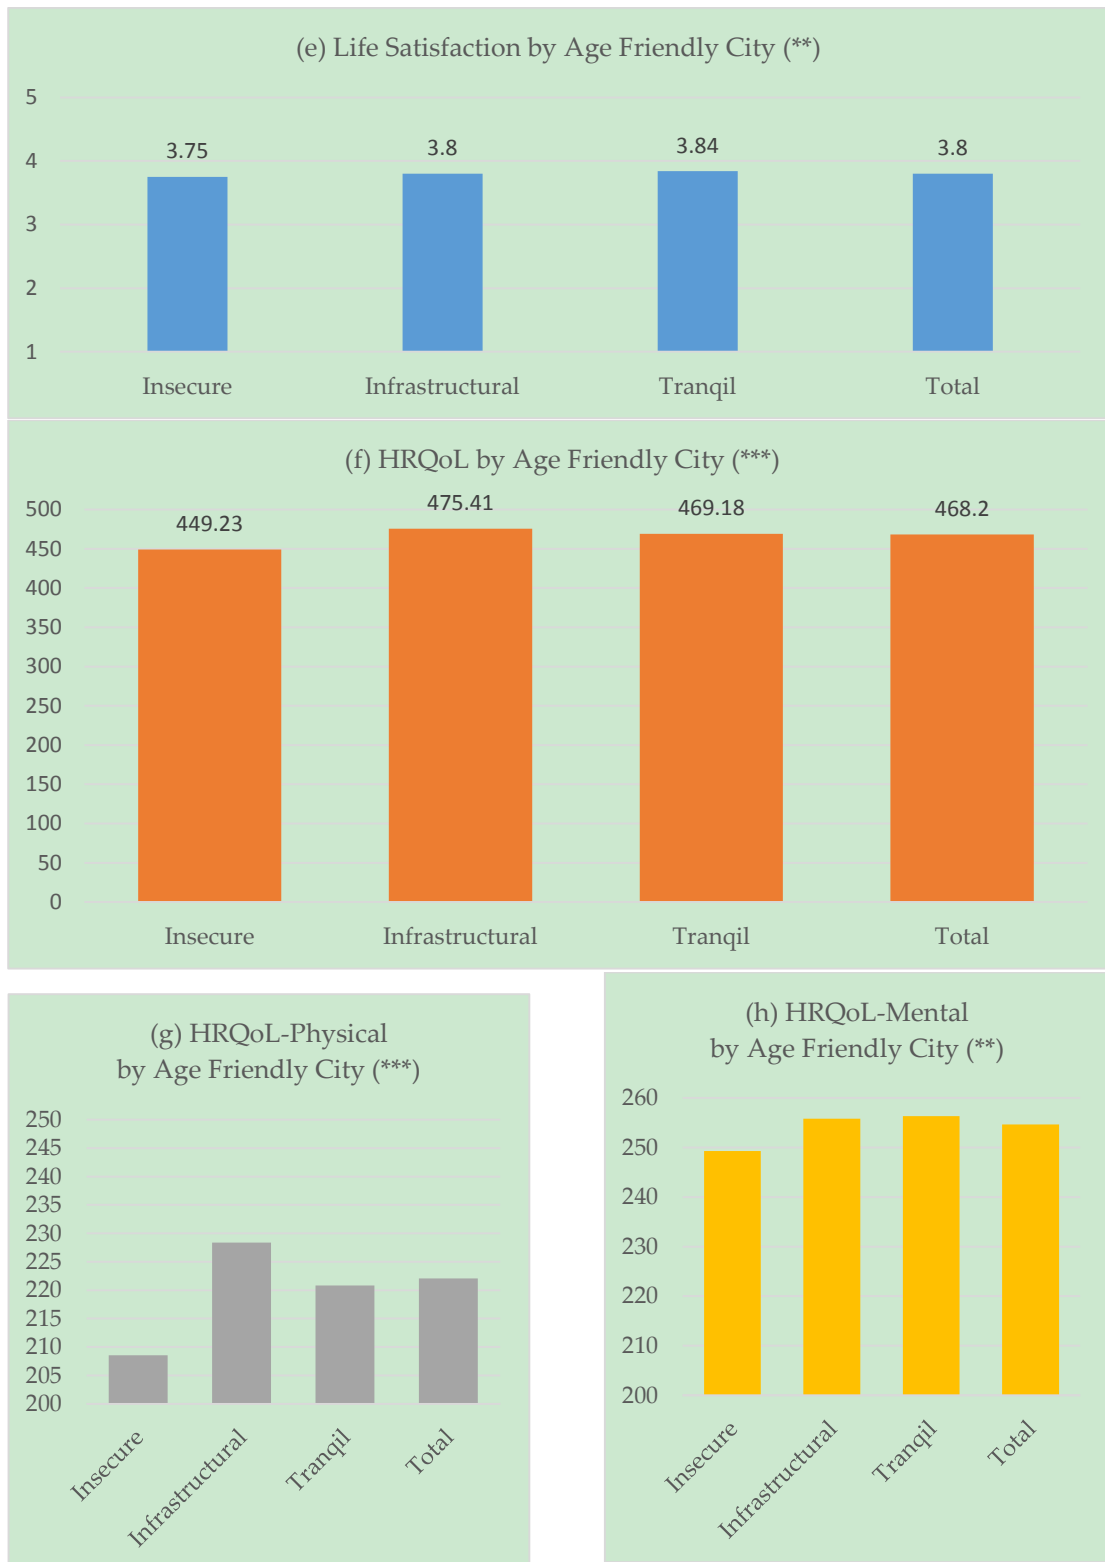

**Figure S1.** Well-being by active aging and age friendly city clusters. Note: Life satisfaction was analyzed for the sample age 55 and above; quality of life was measured for the sample age 65 and above. Analysis by one-way ANOVA, \*\*  $p < 0.01$ , \*\*\*  $p < 0.001$ .

**Table S1.** The sample size and the backgrounds of the cities in 2017.

| Cities          | Sample Size | Total Population | Age 55+ % | Age 65+ % | Average Income for the Recipients (NT) | Life Expectancy for Males | Life Expectancy for Females | Higher Education (College/University+ (%)) | Primary Industry Occupation (%) |
|-----------------|-------------|------------------|-----------|-----------|----------------------------------------|---------------------------|-----------------------------|--------------------------------------------|---------------------------------|
| New Taipei      | 1092        | 3,986,689        | 27.7%     | 12.6%     | 499,221                                | 78.14                     | 84.27                       | 45.61%                                     | 0.69%                           |
| Taipei City     | 807         | 2,683,257        | 31.1%     | 16.4%     | 634,577                                | 80.82                     | 86.29                       | 60.95%                                     | 0.24%                           |
| Taoyuan City    | 510         | 2,188,017        | 23.5%     | 10.8%     | 507,899                                | 77.73                     | 83.97                       | 45.23%                                     | 1.07%                           |
| Keelung City    | 126         | 371,458          | 31.1%     | 14.8%     | 451,478                                | 76.98                     | 82.92                       | 40.30%                                     | 0.39%                           |
| Hsinchu City    | 118         | 441,132          | 23.5%     | 11.5%     | 646,134                                | 77.94                     | 84.08                       | 53.72%                                     | 0.32%                           |
| Yilan County    | 147         | 456,607          | 29.9%     | 15.3%     | 421,125                                | 76.20                     | 83.59                       | 36.99%                                     | 6.58%                           |
| Hsinchu County  | 140         | 552,169          | 23.8%     | 12.0%     | 681,662                                | 77.08                     | 84.06                       | 47.22%                                     | 3.25%                           |
| Taichung City   | 675         | 2,787,070        | 24.8%     | 11.5%     | 495,874                                | 77.37                     | 83.39                       | 46.29%                                     | 2.94%                           |
| Miaolee County  | 161         | 553,807          | 29.4%     | 15.4%     | 416,082                                | 76.01                     | 82.75                       | 37.91%                                     | 6.04%                           |
| Changhwa County | 369         | 1,282,458        | 28.4%     | 14.8%     | 389,335                                | 76.47                     | 83.82                       | 37.27%                                     | 9.47%                           |
| Nantou County   | 160         | 501,051          | 31.8%     | 16.5%     | 350,159                                | 75.01                     | 82.41                       | 34.46%                                     | 17.57%                          |
| Yunlin County   | 223         | 690,373          | 31.5%     | 17.6%     | 332,335                                | 74.76                     | 82.63                       | 32.13%                                     | 19.70%                          |
| Tainan City     | 560         | 1,886,522        | 29.3%     | 14.4%     | 431,766                                | 76.67                     | 83.00                       | 42.92%                                     | 7.03%                           |
| Kaohsiung City  | 808         | 2,776,912        | 29.1%     | 14.2%     | 464,956                                | 75.93                     | 82.41                       | 43.65%                                     | 3.31%                           |
| Chiayi City     | 121         | 269,398          | 27.7%     | 14.2%     | 454,919                                | 76.69                     | 83.11                       | 47.85%                                     | 1.90%                           |
| Chiayi County   | 172         | 511,182          | 33.7%     | 18.5%     | 345,739                                | 75.17                     | 83.06                       | 30.56%                                     | 21.96%                          |
| Pingtung County | 266         | 829,939          | 31.2%     | 15.8%     | 396,335                                | 73.54                     | 80.7                        | 33.85%                                     | 16.59%                          |
| Taitung County  | 118         | 329,237          | 30.5%     | 15.3%     | 399,369                                | 72.77                     | 81.46                       | 36.63%                                     | 8.76%                           |
| Hualien County  | 118         | 219,540          | 30.3%     | 15.6%     | 413,695                                | 71.50                     | 80.40                       | 29.96%                                     | 18.41%                          |
| Islands         | 229         | 254,409          | 29.1%     | 13.5%     | ---                                    | ---                       | ---                         | ---                                        | ---                             |
| Penghu          | ---         | 104,073          | 29.3%     | 15.5%     | 354,109                                | 76.63                     | 84.05                       | 36.84%                                     | 5.01%                           |
| Kingmen         | ---         | 137,456          | 29.1%     | 12.2%     | ---                                    | ---                       | ---                         | 48.05%                                     | ---                             |
| Lienchian       | ---         | 12,880           | 26.8%     | 10.6%     | ---                                    | ---                       | ---                         | 46.09%                                     | ---                             |

Note: The population was based on the statistics in 2016, the same time as the survey year. Some statistic data are unavailable for island areas. Primary industry includes agriculture, forestry, fishing and animal husbandry.

**Table S2.** Life satisfaction with city and individual factors of older adults (age 55+).

| Variables                                  | M1a. City Clusters                  |
|--------------------------------------------|-------------------------------------|
| <b>Fixed effects</b>                       |                                     |
| Constant                                   | 1.987 (0.115) ***                   |
| Age                                        | 0.051 (0.007) ***                   |
| Sex (male)                                 | -0.072 (0.021) **                   |
| Marry (having spouse)                      | 0.017 (0.026)                       |
| Education                                  | 0.010 (0.002) ***                   |
| Self-rated health                          | 0.188 (0.012) ***                   |
| Taipei City                                | -0.080 (0.039) *                    |
| Taoyuan City                               | -0.056 (0.043)                      |
| Keelung City                               | 0.055 (0.077)                       |
| Hsinchu City                               | -0.214 (0.086) *                    |
| Yilan County                               | 0.013 (0.073)                       |
| Hsinchu County                             | -0.092 (0.076)                      |
| Taichung City                              | -0.058 (0.040)                      |
| Miaolee County                             | 0.011 (0.069)                       |
| Changhwa County                            | 0.015 (0.050)                       |
| Nantou County                              | -0.108 (0.068)                      |
| Yunlin County                              | 0.045 (0.061)                       |
| Tainan City                                | 0.077 (0.043)                       |
| Kaohsiung City                             | -0.080 (0.038) *                    |
| Chiayi City                                | -0.269 (0.082) **                   |
| Chiayi County                              | 0.137 (0.067) *                     |
| Pingtung County                            | -0.084 (0.05)                       |
| Taitung County                             | 0.003 (0.080)                       |
| Hwalien County                             | 0.059 (0.079)                       |
| Islands                                    | 0.008 (0.061)                       |
| Work                                       | -0.003 (0.024)                      |
| Volunteering                               | 0.030 (0.032)                       |
| Social groups                              | -0.027 (0.029)                      |
| Politics                                   | -0.012 (0.073)                      |
| Caregiving                                 | -0.177 (0.036) ***                  |
| Physically independent                     | 0.235 (0.098) *                     |
| Not depressed                              | 0.281 (0.024) ***                   |
| Living alone                               | -0.181 (0.039) ***                  |
| Owning house                               | 0.243 (0.043) ***                   |
| Non-poverty                                | 0.057 (0.024) *                     |
| Socially connected                         | 0.117 (0.022) ***                   |
| Internet                                   | 0.065 (0.024) **                    |
| Lifelong learning                          | 0.091 (0.044) *                     |
| Public transportation: convenient          | -0.078 (0.086)                      |
| Public transportation: inconvenient        | -0.026 (0.087)                      |
| Public Transportation: safe                | 0.133 (0.084)                       |
| Respected                                  | 0.253 (0.021) ***                   |
| <b>Random effects covariance of cities</b> |                                     |
| Residual                                   | 0.549 (0.010)                       |
| City                                       | 0.000 (0.000)                       |
| Model fit                                  | -2LL = 13,158.632, BIC = 13,175.952 |

Note:  $n = 5816$ . Missing cases were excluded listwise. Analysis by mixed linear model. Reference groups of categorical variables: Sex (male), marital status (no spouse), city (New Taipei), work (no), volunteering (no), social groups (no), politics (no), caregiving (no), physical function (dependent), non-depressed (depressed), living arrangement (with others), owing house (no), non-poverty (no, i.e. poor), social connected (no), Internet use (no), lifelong learning (no), public transportation convenience (non-users), transportation safety (unsafe), public transportation (non-user), and respected (no). Order variables: Age (1–6), education (1–22), and self-rated health (1–5). -2LL = -2 log likelihood; BIC = Schwarz's Bayesian Criteria. \*  $p < 0.05$ . \*\*  $p < 0.01$ , \*\*\*  $p < 0.001$ .

**Table S3.** Quality of life with cities and individual factors of older adults (aged 65+).

| Variables                                  | M2a. HRQoL                             | M3a. HRQoL-Physical                  | M4a. HRQoL-Mental                   |
|--------------------------------------------|----------------------------------------|--------------------------------------|-------------------------------------|
| <b>Fixed effects</b>                       |                                        |                                      |                                     |
| Constant                                   | 187.416 (111.005)                      | 69.900 (54.895)                      | 107.373 (8.349) ***                 |
| Age                                        | -11.929 (1.714) ***                    | -7.323 (0.957) ***                   | -2.923 (0.529) ***                  |
| Sex (male)                                 | 8.715 (3.890) *                        | 3.308 (2.171)                        | 2.243 (1.533)                       |
| Marry (having spouse)                      | 5.583 (4.533)                          | 3.879 (2.530)                        | 4.509 (1.872) *                     |
| Education                                  | -0.008 (0.412)                         | 0.042 (0.230)                        | 0.020 (0.158)                       |
| Taipei City                                | -31.937 (154.959)                      | -11.426 (76.355)                     | -14.379 (2.812) ***                 |
| Taoyuan City                               | -29.803 (154.999)                      | -11.631 (76.380)                     | -15.347 (3.176) ***                 |
| Keelung City                               | 9.605 (155.666)                        | 1.246 (76.646)                       | 8.149 (5.618)                       |
| Hsinchu City                               | -52.856 (155.666)                      | -29.622 (76.801)                     | -10.829 (6.295) **                  |
| Yilan County                               | 19.366 (155.365)                       | 5.702 (76.712)                       | 13.006 (5.532) *                    |
| Hsinchu County                             | 4.018 (155.438)                        | -4.431 (76.658)                      | 1.234 (5.533)                       |
| Taichung City                              | -14.959 (154.974)                      | -13.499 (76.364)                     | -1.111 (2.925)                      |
| Miaolee County                             | -20.130 (155.302)                      | -9.095 (76.572)                      | -11.568 (4.997) *                   |
| Changhwa County                            | -5.334 (155.071)                       | -11.867 (76.426)                     | 4.338 (3.641)                       |
| Nantou County                              | -21.771 (155.282)                      | -13.817 (76.559)                     | -4.745 (4.941)                      |
| Yunlin County                              | -32.185 (155.200)                      | -24.951 (76.508)                     | -7.782 (4.416)                      |
| Tainan City                                | -7.491 (155.005)                       | -6.810 (76.384)                      | 2.755 (3.174)                       |
| Kaohsiung City                             | -40.443 (154.963)                      | -15.702 (76.357)                     | -19.949 (2.807) ***                 |
| Chiayi City                                | -56.909 (155.536)                      | -31.514 (76.719)                     | -22.413 (5.983) ***                 |
| Chiayi County                              | 22.192 (155.286)                       | 1.147 (76.561)                       | 16.945 (4.915) **                   |
| Pingtung County                            | -57.972 (15.156)                       | -28.074 (76.479)                     | -24.453 (4.178) ***                 |
| Taitung County                             | -68.455 (155.491)                      | -24.108 (76.691)                     | -29.079 (5.867) ***                 |
| Hualien County                             | -45.029 (155.461)                      | -22.140 (76.671)                     | -20.398 (45785)***                  |
| Islands                                    | -15.198 (155.196)                      | -7.077 (76.505)                      | -2.100 (4.505)                      |
| Work                                       | 31.636 (5.282) ***                     | 18.826 (2.949) ***                   | 11.619 (1.769) ***                  |
| Volunteering                               | 28.758 (6.364) ***                     | 14.793 (3.553) ***                   | 11.363 (2.372) ***                  |
| Social groups                              | -3.932 (5.207)                         | 1.980 (2.9076)                       | -7.166 (2.120) **                   |
| Politics                                   | -33.416 (13.606) *                     | -8.605 (7.595)                       | -16.423 (5.388) **                  |
| Caregiving                                 | -7.958 (7.053)                         | 1.009 (3.937)                        | -6.403 (2.643) *                    |
| Physically independent                     | 258.285 (13.561) ***                   | 152999 (7.570) ***                   | 109.274 (7.101) ***                 |
| Happy                                      | 33.794 (4.909) ***                     | 12.473 (2.740) ***                   | 21.560 (2.049) ***                  |
| Living alone                               | -7.473 (6.509)                         | 1.130 (3.633)                        | -8.476 (2.859) **                   |
| Owning house                               | 15.760 (8.438)                         | 8.831 (4.710)                        | 7.348 (3.120) *                     |
| Non-poverty                                | -2.229 (4.823)                         | -2.973 (2.692)                       | 3.712 (1.776) *                     |
| Socially connected                         | 30.125 (3.878)                         | 14.517 (2.165) ***                   | 13.714 (1.620) ***                  |
| Internet                                   | 23.491 (3.878) ***                     | 10.057 (2.667) ***                   | 10.332 (1.789) ***                  |
| Lifelong learning                          | 8.475 (8.463)                          | 1.749 (4.724)                        | 4.545 (3.194) ***                   |
| Public transportation: convenient          | 1.016 (15.026)                         | 11.916 (8.387)                       | -12.412 (6.301) *                   |
| Public transportation: inconvenient        | -24.180 (15.120)                       | -6.647 (8.440)                       | -17.290 (6.382) **                  |
| Public Transportation: safe                | 38.580 (14.619) **                     | 10.472 (8.160)                       | 25.489 (6.158) ***                  |
| Respected                                  | 11.139 (3.952) **                      | 2.370 (2.207)                        | 7.176 (1.559) ***                   |
| <b>Random effects covariance of cities</b> |                                        |                                      |                                     |
| Residual                                   | 10,541.556 (257.687) ***               | 3284.577 (80.291) ***                | 2935.754 (54.676) ***               |
| City                                       | 11,981.897 (2.748 × 10 <sup>-5</sup> ) | 2907.464 (2.173 × 10 <sup>-5</sup> ) | 0.000 (0.000)                       |
| <b>Model fit</b>                           | -2LL = 40,724.004, BIC = 40,740.235    | -2LL = 36,821.109, BIC = 36,837.341  | -2LL = 62,648.683, BIC = 62,666.003 |

Note:  $n = 3395$ . Missing cases were excluded listwise. Analysis by mixed linear model. Reference groups of categorical variables: Sex (male), marital status (no spouse), city (New Taipei), work (no), volunteering (no), social groups (no), politics (no), caregiving (no), physical function (dependent), mental well-being (not happy), living arrangement (with others), owing house (no), non-poverty (no, i.e. poor), social connected (no), Internet use (no), lifelong learning (no), public transportation convenience (non-users), transportation safety (unsafe), public transportation (non-user), and respected (no). Order variables: Age (1–6), education (1–22). -2LL = -2 log likelihood; BIC = Schwarz Bayesian Criteria. \*  $p < 0.05$ . \*\*  $p < 0.01$ , \*\*\*  $p < 0.001$ .

**Table S4.** Association of active aging city typologies with individuals' age, sex, and health by multinomial logistic regression (odds ratios).

| Variables                                                                                                          | Content City Cluster | Developed City Cluster | Participatory City Cluster |
|--------------------------------------------------------------------------------------------------------------------|----------------------|------------------------|----------------------------|
| Sex: female                                                                                                        | 0.877                | 0.859                  | 0.762                      |
| Age 65–74                                                                                                          | 0.498                | 0.463                  | 0.511                      |
| Age 75+                                                                                                            | 1.442                | 1.370                  | 0.863                      |
| Self-rated health                                                                                                  | 1.077                | 1.408                  | 1.062                      |
| Age 65–74 * self-rated health                                                                                      | 1.202                | 1.247                  | 1.185                      |
| Age 65+ * self-rated health                                                                                        | 0.836                | 0.878                  | 0.992                      |
| Model fit: $-2 \log \text{likelihood} = 447.672$ , $\text{Chi-square} = 64.285$ , $\text{df} = 18$ , $p < 0.001$ . |                      |                        |                            |

Note: The reference group: Active Aging City cluster (pioneer), sex (male), age (age 55–74). All the parameters were not significant.

**Table S5.** Association of age friendly city typologies with individuals' age, sex, and health by multinomial logistic regression (odds ratios).

| Variables                                                                                                          | Infrastructural City Cluster | Tranquil City Cluster |
|--------------------------------------------------------------------------------------------------------------------|------------------------------|-----------------------|
| Sex: female                                                                                                        | 0.984                        | 0.944                 |
| Age 65–74                                                                                                          | 0.849                        | 0.685                 |
| Age 75+                                                                                                            | 1.406                        | 2.470 **              |
| Self-rated health                                                                                                  | 1.277 ***                    | 1.235 **              |
| Age 65–74 * self-rated health                                                                                      | 1.082                        | 1.137                 |
| Age 75+ * self-rated health                                                                                        | 0.890                        | 0.776 **              |
| Model fit: $-2 \log \text{likelihood} = 381.163$ , $\text{Chi-square} = 68.275$ , $\text{df} = 12$ , $p < 0.001$ . |                              |                       |

Note: The reference group: Age Friendly City cluster (Insecure), sex (male), age (age 55–64). \*  $p < 0.05$ , \*\*  $p < 0.01$ , \*\*\*  $p < 0.001$ .
